# Supplementary material for: Treadmill exercise modulates the medial prefrontal-amygdala neural circuit to improve the resilience against chronic restraint stress
Source: PubMed Central journal article supplement (PMC10256706; doi:10.1038/s42003-023-05003-w), 2023-06-09
Supplement: 42003_2023_5003_MOESM2_ESM.pdf [file 42003_2023_5003_MOESM2_ESM.pdf]

## Description of Additional Supplementary Files

**File name:** Supplementary Data

**Description:** All source data supporting the conclusion of this work
